# Supplementary material for: Affinity-based profiling of endogenous phosphoprotein phosphatases by mass spectrometry
Source: Springer Nature journal article supplement (doi:10.1038/s41596-021-00604-3), 2021-09-13
Supplement: MOESM1 [file 41596_2021_604_MOESM1_ESM10.xlsx]

## Sheet: PPP Annotation
Uniprot ID	Entry Name	PPP Subunit	Gene Name	Description
P62136	PP1A_HUMAN	PP1C	PPP1CA	Serine/threonine-protein phosphatase PP1-alpha catalytic subunit
P62140	PP1B_HUMAN	PP1C	PPP1CB	Serine/threonine-protein phosphatase PP1-beta catalytic subunit
P36873	PP1G_HUMAN	PP1C	PPP1CC	Serine/threonine-protein phosphatase PP1-gamma catalytic subunit
P61981	1433G_HUMAN	PP1R	YWHAG	14-3-3 protein gamma
A0A024R2N7	A0A024R2N7_HUMAN	PP1R	AXUD1	Cysteine/serine-rich nuclear protein 1
A0A024R2R9	A0A024R2R9_HUMAN	PP1R	C3orf23	Isoform 3 of T-cell activation inhibitor, mitochondrial
A0A024R5P7	A0A024R5P7_HUMAN	PP1R	C1orf71	Chromosome 1 open reading frame 71, isoform CRA_c
A0A024R7V9	A0A024R7V9_HUMAN	PP1R	ANUBL1	AN1-type zinc finger protein 4
A6N6J7	A6N6J7_HUMAN	PP1R	JARID1C	[Histone H3]-trimethyl-L-lysine(4) demethylase
Q99758	ABCA3_HUMAN	PP1R	ABCA3	ATP-binding cassette sub-family A member 3
Q9UKA4	AKA11_HUMAN	PP1R	AKAP11	A-kinase anchor protein 11
Q92667	AKAP1_HUMAN	PP1R	AKAP1	A-kinase anchor protein 1, mitochondrial
Q99996	AKAP9_HUMAN	PP1R	AKAP9	A-kinase anchor protein 9
Q8TCU4	ALMS1_HUMAN	PP1R	ALMS1	Alstrom syndrome protein 1
Q8IY45	AMN1_HUMAN	PP1R	AMN1	Protein AMN1 homolog
Q8N9B4	ANR42_HUMAN	PP1R	ANKRD42	Ankyrin repeat domain-containing protein 42
P25054	APC_HUMAN	PP1R	APC	Adenomatous polyposis coli protein
Q96PE2	ARHGH_HUMAN	PP1R	ARHGEF17	Rho guanine nucleotide exchange factor 17
Q96KQ4	ASPP1_HUMAN	PP1R	PPP1R13B	Apoptosis-stimulating of p53 protein 1
Q13625	ASPP2_HUMAN	PP1R	TP53BP2	Apoptosis-stimulating of p53 protein 2
O14965	AURKA_HUMAN	PP1R	AURKA	Aurora kinase A
Q96GD4	AURKB_HUMAN	PP1R	AURKB	Aurora kinase B
O15169	AXIN1_HUMAN	PP1R	AXIN1	Axin-1
Q07817	B2CL1_HUMAN	PP1R	BCL2L1	Bcl-2-like protein 1
Q92843	B2CL2_HUMAN	PP1R	BCL2L2	Bcl-2-like protein 2
Q67FW5	B3GNL_HUMAN	PP1R	B3GNTL1	UDP-GlcNAc:betaGal beta-1,3-N-acetylglucosaminyltransferase-like protein 1
B7ZM74	B7ZM74_HUMAN	PP1R	LOC441476	protein STPG3 isoform d
P10415	BCL2_HUMAN	PP1R	BCL2	apoptosis regulator Bcl-2 isoform alpha
Q5TH69	BIG3_HUMAN	PP1R	ARFGEF3	Brefeldin A-inhibited guanine nucleotide-exchange protein 3
P38398	BRCA1_HUMAN	PP1R	BRCA1	Breast cancer type 1 susceptibility protein
O95696	BRD1_HUMAN	PP1R	BRD1	Bromodomain-containing protein 1
Q9P1Y5	CAMP3_HUMAN	PP1R	CAMSAP3	Calmodulin-regulated spectrin-associated protein 3
Q6TDU7	CASC1_HUMAN	PP1R	CASC1	Dynein intermediate chain CFAP94, axonemal
P42575	CASP2_HUMAN	PP1R	CASP2	Caspase-2
P55211	CASP9_HUMAN	PP1R	CASP9	Caspase-9
A6NKD9	CC85C_HUMAN	PP1R	CCDC85C	Coiled-coil domain-containing protein 85C
Q9H0W5	CCDC8_HUMAN	PP1R	CCDC8	Coiled-coil domain-containing protein 8
O95400	CD2B2_HUMAN	PP1R	CD2BP2	CD2 antigen cytoplasmic tail-binding protein 2
Q69YH5	CDCA2_HUMAN	PP1R	CDCA2	Cell division cycle-associated protein 2
O94986	CE152_HUMAN	PP1R	CEP152	Centrosomal protein of 152 kDa
Q8TEP8	CE192_HUMAN	PP1R	CEP192	Centrosomal protein of 192 kDa
Q02224	CENPE_HUMAN	PP1R	CENPE	Centromere-associated protein E
Q9NQ89	CL004_HUMAN	PP1R	C12orf4	Protein C12orf4
Q96MD2	CL066_HUMAN	PP1R	C12orf66	KICSTOR complex protein C12orf66
P51798	CLCN7_HUMAN	PP1R	CLCN7	H(+)/Cl(-) exchange transporter 7
Q6PJW8	CNST_HUMAN	PP1R	CNST	Consortin
Q96PZ7	CSMD1_HUMAN	PP1R	CSMD1	CUB and sushi domain-containing protein 1
Q7Z407	CSMD3_HUMAN	PP1R	CSMD3	CUB and sushi domain-containing protein 3
Q9H175	CSRN2_HUMAN	PP1R	CSRNP2	Cysteine/serine-rich nuclear protein 2
Q8WYN3	CSRN3_HUMAN	PP1R	CSRNP3	Cysteine/serine-rich nuclear protein 3
Q5M775	CYTSB_HUMAN	PP1R	SPECC1	Cytospin-B
Q9H8H2	DDX31_HUMAN	PP1R	DDX31	Probable ATP-dependent RNA helicase DDX31
Q12959	DLG1_HUMAN	PP1R	DLG1	Disks large homolog 1
Q15700	DLG2_HUMAN	PP1R	DLG2	Disks large homolog 2
Q92796	DLG3_HUMAN	PP1R	DLG3	Disks large homolog 3
Q15054	DPOD3_HUMAN	PP1R	POLD3	DNA polymerase delta subunit 3
Q8TE73	DYH5_HUMAN	PP1R	DNAH5	Dynein heavy chain 5, axonemal
Q86Y13	DZIP3_HUMAN	PP1R	DZIP3	E3 ubiquitin-protein ligase DZIP3
P19525	E2AK2_HUMAN	PP1R	EIF2AK2	Interferon-induced, double-stranded RNA-activated protein kinase
P0C7U0	ELFN1_HUMAN	PP1R	ELFN1	Protein ELFN1
P55199	ELL_HUMAN	PP1R	ELL	RNA polymerase II elongation factor ELL
Q0PNE2	ELP6_HUMAN	PP1R	ELP6	Elongator complex protein 6
Q05397	FAK1_HUMAN	PP1R	PTK2	Focal adhesion kinase 1
Q9Y4F1	FARP1_HUMAN	PP1R	FARP1	FERM, ARHGEF and pleckstrin domain-containing protein 1
P16591	FER_HUMAN	PP1R	FER	Tyrosine-protein kinase Fer
Q5T1M5	FKB15_HUMAN	PP1R	FKBP15	FK506-binding protein 15
A1L4K1	FSD2_HUMAN	PP1R	FSD2	Fibronectin type III and SPRY domain-containing protein 2
Q68CZ1	FTM_HUMAN	PP1R	RPGRIP1L	Protein fantom
P47775	GPR12_HUMAN	PP1R	GPR12	G-protein coupled receptor 12
Q9NW75	GPTC2_HUMAN	PP1R	GPATCH2	G patch domain-containing protein 2
A8MXD5	GRCR1_HUMAN	PP1R	GRXCR1	Glutaredoxin domain-containing cysteine-rich protein 1
A6NFK2	GRCR2_HUMAN	PP1R	GRXCR2	Glutaredoxin domain-containing cysteine-rich protein 2
Q13255	GRM1_HUMAN	PP1R	GRM1	Metabotropic glutamate receptor 1
P41594	GRM5_HUMAN	PP1R	GRM5	Metabotropic glutamate receptor 5
Q14831	GRM7_HUMAN	PP1R	GRM7	Metabotropic glutamate receptor 7
P51610	HCFC1_HUMAN	PP1R	HCFC1	Host cell factor 1
Q9UBN7	HDAC6_HUMAN	PP1R	HDAC6	Histone deacetylase 6
O14558	HSPB6_HUMAN	PP1R	HSPB6	Heat shock protein beta-6
Q4G0P3	HYDIN_HUMAN	PP1R	HYDIN	Hydrocephalus-inducing protein homolog
Q8WUF5	IASPP_HUMAN	PP1R	PPP1R13L	RelA-associated inhibitor
P20042	IF2B_HUMAN	PP1R	EIF2S2	Eukaryotic translation initiation factor 2 subunit 2
Q13422	IKZF1_HUMAN	PP1R	IKZF1	DNA-binding protein Ikaros
Q96PE3	INP4A_HUMAN	PP1R	INPP4A	Inositol polyphosphate-4-phosphatase type I A
P08514	ITA2B_HUMAN	PP1R	ITGA2B	Integrin alpha-IIb
Q14643	ITPR1_HUMAN	PP1R	ITPR1	Inositol 1,4,5-trisphosphate receptor type 1
Q14571	ITPR2_HUMAN	PP1R	ITPR2	Inositol 1,4,5-trisphosphate receptor type 2
Q14573	ITPR3_HUMAN	PP1R	ITPR3	Inositol 1,4,5-trisphosphate receptor type 3
P17658	KCNA6_HUMAN	PP1R	KCNA6	Potassium voltage-gated channel subfamily A member 6
P57789	KCNKA_HUMAN	PP1R	KCNK10	Potassium channel subfamily K member 10
Q9BY66	KDM5D_HUMAN	PP1R	KDM5D	Lysine-specific demethylase 5D
Q8NI77	KI18A_HUMAN	PP1R	KIF18A	Kinesin-like protein KIF18A
P46013	KI67_HUMAN	PP1R	MKI67	Proliferation marker protein Ki-67
Q8IX03	KIBRA_HUMAN	PP1R	WWC1	Protein KIBRA
O60333	KIF1B_HUMAN	PP1R	KIF1B	Kinesin-like protein KIF1B
A6NCF5	KLH33_HUMAN	PP1R	KLHL33	Kelch-like protein 33
Q8NG31	KNL1_HUMAN	PP1R	KNL1	Kinetochore scaffold 1
L8E7E7	L8E7E7_HUMAN	PP1R	KIAA0317	Alternative protein KIAA0317
Q6ZMQ8	LMTK1_HUMAN	PP1R	AATK	Serine/threonine-protein kinase LMTK1
Q8IWU2	LMTK2_HUMAN	PP1R	LMTK2	Serine/threonine-protein kinase LMTK2
Q96Q04	LMTK3_HUMAN	PP1R	LMTK3	Serine/threonine-protein kinase LMTK3
Q9Y6R4	M3K4_HUMAN	PP1R	MAP3K4	Mitogen-activated protein kinase kinase kinase 4
P46821	MAP1B_HUMAN	PP1R	MAP1B	Microtubule-associated protein 1B
Q9Y4F3	MARF1_HUMAN	PP1R	MARF1	Meiosis regulator and mRNA stability factor 1
P33993	MCM7_HUMAN	PP1R	MCM7	DNA replication licensing factor MCM7
Q71SY5	MED25_HUMAN	PP1R	MED25	Mediator of RNA polymerase II transcription subunit 25
Q9NX63	MIC19_HUMAN	PP1R	CHCHD3	MICOS complex subunit MIC19
Q9BRQ6	MIC25_HUMAN	PP1R	CHCHD6	MICOS complex subunit MIC25
P30307	MPIP3_HUMAN	PP1R	CDC25C	M-phase inducer phosphatase 3
O00566	MPP10_HUMAN	PP1R	MPHOSPH10	U3 small nucleolar ribonucleoprotein protein MPP1
Q9Y6X6	MYO16_HUMAN	PP1R	MYO16	Unconventional myosin-XVI
O94832	MYO1D_HUMAN	PP1R	MYO1D	Unconventional myosin-Id
O14974	MYPT1_HUMAN	PP1R	PPP1R12A	Protein phosphatase 1 regulatory subunit 12A
O60237	MYPT2_HUMAN	PP1R	PPP1R12B	Protein phosphatase 1 regulatory subunit 12B
O75376	NCOR1_HUMAN	PP1R	NCOR1	Nuclear receptor corepressor 1
Q9ULJ8	NEB1_HUMAN	PP1R	PPP1R9A	Neurabin-1
Q96SB3	NEB2_HUMAN	PP1R	PPP1R9B	Neurabin-2
P51955	NEK2_HUMAN	PP1R	NEK2	Serine/threonine-protein kinase Nek2
P07196	NFL_HUMAN	PP1R	NEFL	Neurofilament light polypeptide
Q9Y3T9	NOC2L_HUMAN	PP1R	NOC2L	Nucleolar complex protein 2 homolog
Q9BZE4	NOG1_HUMAN	PP1R	GTPBP4	Nucleolar GTP-binding protein 1
Q5C9Z4	NOM1_HUMAN	PP1R	NOM1	Nucleolar MIF4G domain-containing protein 1
Q15233	NONO_HUMAN	PP1R	NONO	Non-POU domain-containing octamer-binding protein
Q16625	OCLN_HUMAN	PP1R	OCLN	Occludin
Q9H1Y3	OPN3_HUMAN	PP1R	OPN3	Opsin-3
O43913	ORC5_HUMAN	PP1R	ORC5	Origin recognition complex subunit 5
Q8TEW0	PARD3_HUMAN	PP1R	PARD3	Partitioning defective 3 homolog
Q9BZA7	PC11X_HUMAN	PP1R	PCDH11X	Protocadherin-11 X-linked
Q9BZA8	PC11Y_HUMAN	PP1R	PCDH11Y	Protocadherin-11 Y-linked
Q08174	PCDH1_HUMAN	PP1R	PCDH1	Protocadherin-1
O60245	PCDH7_HUMAN	PP1R	PCDH7	Protocadherin-7
Q9HC56	PCDH9_HUMAN	PP1R	PCDH9	Protocadherin-9
Q9H4Z3	PCIF1_HUMAN	PP1R	PCIF1	mRNA (2'-O-methyladenosine-N(6)-)-methyltransferase
P08237	PFKAM_HUMAN	PP1R	PFKM	ATP-dependent 6-phosphofructokinase, muscle type
Q96KR7	PHAR3_HUMAN	PP1R	PHACTR3	Phosphatase and actin regulator 3
Q8IZ21	PHAR4_HUMAN	PP1R	PHACTR4	Phosphatase and actin regulator 4
Q9P1Y6	PHRF1_HUMAN	PP1R	PHRF1	PHD and RING finger domain-containing protein 1
Q15111	PLCL1_HUMAN	PP1R	PLCL1	Inactive phospholipase C-like protein 1
Q99640	PMYT1_HUMAN	PP1R	PKMYT1	Membrane-associated tyrosine- and threonine-specific cdc2-inhibitory kinase
Q9BZL4	PP12C_HUMAN	PP1R	PPP1R12C	Protein phosphatase 1 regulatory subunit 12C
B7ZBB8	PP13G_HUMAN	PP1R	PPP1R3G	Protein phosphatase 1 regulatory subunit 3G
Q96I34	PP16A_HUMAN	PP1R	PPP1R16A	Protein phosphatase 1 regulatory subunit 16A
Q96T49	PP16B_HUMAN	PP1R	PPP1R16B	Protein phosphatase 1 regulatory inhibitor subunit 16B
Q15435	PP1R7_HUMAN	PP1R	PPP1R7	Protein phosphatase 1 regulatory subunit 7
Q12972	PP1R8_HUMAN	PP1R	PPP1R8	Nuclear inhibitor of protein phosphatase 1
Q96QC0	PP1RA_HUMAN	PP1R	PPP1R10	Serine/threonine-protein phosphatase 1 regulatory subunit 10
O60927	PP1RB_HUMAN	PP1R	PPP1R11	E3 ubiquitin-protein ligase PPP1R11
O96001	PPR17_HUMAN	PP1R	PPP1R17	Protein phosphatase 1 regulatory subunit 17
Q6NYC8	PPR18_HUMAN	PP1R	PPP1R18	Phostensin
Q8WVI7	PPR1C_HUMAN	PP1R	PPP1R1C	Protein phosphatase 1 regulatory subunit 1C
Q6ZMI0	PPR21_HUMAN	PP1R	PPP1R21	Protein phosphatase 1 regulatory subunit 21
Q5T8A7	PPR26_HUMAN	PP1R	PPP1R26	Protein phosphatase 1 regulatory subunit 26
Q86WC6	PPR27_HUMAN	PP1R	PPP1R27	Protein phosphatase 1 regulatory subunit 27
Q5R3F8	PPR29_HUMAN	PP1R	ELFN2	Protein phosphatase 1 regulatory subunit 29
Q7Z5V6	PPR32_HUMAN	PP1R	PPP1R32	Protein phosphatase 1 regulatory subunit 32
Q8TAP8	PPR35_HUMAN	PP1R	PPP1R35	Protein phosphatase 1 regulatory subunit 35
Q96LQ0	PPR36_HUMAN	PP1R	PPP1R36	Protein phosphatase 1 regulatory subunit 36
O75864	PPR37_HUMAN	PP1R	PPP1R37	Protein phosphatase 1 regulatory subunit 37
Q16821	PPR3A_HUMAN	PP1R	PPP1R3A	Protein phosphatase 1 regulatory subunit 3A
Q86XI6	PPR3B_HUMAN	PP1R	PPP1R3B	Protein phosphatase 1 regulatory subunit 3B
Q9UQK1	PPR3C_HUMAN	PP1R	PPP1R3C	Protein phosphatase 1 regulatory subunit 3C
O95685	PPR3D_HUMAN	PP1R	PPP1R3D	Protein phosphatase 1 regulatory subunit 3D
Q9H7J1	PPR3E_HUMAN	PP1R	PPP1R3E	Protein phosphatase 1 regulatory subunit 3E
Q6ZSY5	PPR3F_HUMAN	PP1R	PPP1R3F	Protein phosphatase 1 regulatory subunit 3F
Q7Z4L9	PPR42_HUMAN	PP1R	PPP1R42	Protein phosphatase 1 regulatory subunit 42
O75807	PR15A_HUMAN	PP1R	PPP1R15A	Protein phosphatase 1 regulatory subunit 15A
Q5SWA1	PR15B_HUMAN	PP1R	PPP1R15B	Protein phosphatase 1 regulatory subunit 15B
Q8TCU6	PREX1_HUMAN	PP1R	PREX1	Phosphatidylinositol 3,4,5-trisphosphate-dependent Rac exchanger 1 protein
Q70Z35	PREX2_HUMAN	PP1R	PREX2	Phosphatidylinositol 3,4,5-trisphosphate-dependent Rac exchanger 2 protein
Q2KHR3	QSER1_HUMAN	PP1R	QSER1	Glutamine and serine-rich protein 1
P15918	RAG1_HUMAN	PP1R	RAG1	V(D)J recombination-activating protein 1
Q02833	RASF7_HUMAN	PP1R	RASSF7	Ras association domain-containing protein 7
Q8NHQ8	RASF8_HUMAN	PP1R	RASSF8	Ras association domain-containing protein 8
Q8TDY2	RBCC1_HUMAN	PP1R	RB1CC1	RB1-inducible coiled-coil protein 1
Q5T8P6	RBM26_HUMAN	PP1R	RBM26	RNA-binding protein 26
Q52LW3	RHG29_HUMAN	PP1R	ARHGAP29	Rho GTPase-activating protein 29
Q5UIP0	RIF1_HUMAN	PP1R	RIF1	Telomere-associated protein RIF1
O15034	RIMB2_HUMAN	PP1R	RIMBP2	RIMS-binding protein 2
P83731	RL24_HUMAN	PP1R	RPL24	60S ribosomal protein L24
P46777	RL5_HUMAN	PP1R	RPL5	60S ribosomal protein L5
O94763	RMP_HUMAN	PP1R	URI1	Unconventional prefoldin RPB5 interactor 1
Q9H6T3	RPAP3_HUMAN	PP1R	RPAP3	RNA polymerase II-associated protein 3
Q14684	RRP1B_HUMAN	PP1R	RRP1B	Ribosomal RNA processing protein 1 homolog B
Q5VWQ0	RSBN1_HUMAN	PP1R	RSBN1	Lysine-specific demethylase 9
P21817	RYR1_HUMAN	PP1R	RYR1	Ryanodine receptor 1
P55011	S12A2_HUMAN	PP1R	SLC12A2	Solute carrier family 12 member 2
Q9NTN3	S35D1_HUMAN	PP1R	SLC35D1	UDP-glucuronic acid/UDP-N-acetylgalactosamine transporter
Q8TBB6	S7A14_HUMAN	PP1R	SLC7A14	Probable cationic amino acid transporter
Q9NZJ4	SACS_HUMAN	PP1R	SACS	Sacsin
O43865	SAHH2_HUMAN	PP1R	AHCYL1	S-adenosylhomocysteine hydrolase-like protein 1
A8K8P3	SFI1_HUMAN	PP1R	SFI1	Protein SFI1 homolog
P23246	SFPQ_HUMAN	PP1R	SFPQ	Splicing factor, proline- and glutamine-rich
Q8N474	SFRP1_HUMAN	PP1R	SFRP1	Secreted frizzled-related protein 1
Q96HF1	SFRP2_HUMAN	PP1R	SFRP2	Secreted frizzled-related protein 2
Q5T4F7	SFRP5_HUMAN	PP1R	SFRP5	Secreted frizzled-related protein 5
Q9H788	SH24A_HUMAN	PP1R	SH2D4A	SH2 domain-containing protein 4A
Q5SQS7	SH24B_HUMAN	PP1R	SH2D4B	SH2 domain-containing protein 4B
Q8TEC5	SH3R2_HUMAN	PP1R	SH3RF2	E3 ubiquitin-protein ligase SH3RF2
Q9Y371	SHLB1_HUMAN	PP1R	SH3GLB1	Endophilin-B1
P19634	SL9A1_HUMAN	PP1R	SLC9A1	Sodium/hydrogen exchanger 1
Q12824	SNF5_HUMAN	PP1R	SMARCB1	SWI/SNF-related matrix-associated actin-dependent regulator of chromatin subfamily B member 1
Q9UM82	SPAT2_HUMAN	PP1R	SPATA2	Spermatogenesis-associated protein 2
Q9H0A9	SPC1L_HUMAN	PP1R	SPATC1L	Speriolin-like protein
Q6ZMY3	SPOC1_HUMAN	PP1R	SPOCD1	SPOC domain-containing protein 1
Q7Z699	SPRE1_HUMAN	PP1R	SPRED1	Sprouty-related, EVH1 domain-containing protein 1
Q7Z698	SPRE2_HUMAN	PP1R	SPRED2	Sprouty-related, EVH1 domain-containing protein 2
Q9BXG8	SPZ1_HUMAN	PP1R	SPZ1	Spermatogenic leucine zipper protein 1
O75494	SRS10_HUMAN	PP1R	SRSF10	Serine/arginine-rich splicing factor 10
O95793	STAU1_HUMAN	PP1R	STAU1	Double-stranded RNA-binding protein Staufen homolog 1
Q9HCH5	SYTL2_HUMAN	PP1R	SYTL2	Synaptotagmin-like protein 2
Q24JP5	T132A_HUMAN	PP1R	TMEM132A	Transmembrane protein 132A
Q14DG7	T132B_HUMAN	PP1R	TMEM132B	Transmembrane protein 132B
Q8N3T6	T132C_HUMAN	PP1R	TMEM132C	Transmembrane protein 132C
Q14C87	T132D_HUMAN	PP1R	TMEM132D	Transmembrane protein 132D
Q6IEE7	T132E_HUMAN	PP1R	TMEM132E	Transmembrane protein 132E
P10636	TAU_HUMAN	PP1R	MAPT	Microtubule-associated protein tau
Q9HBL0	TENS1_HUMAN	PP1R	TNS1	Tensin-1
Q13263	TIF1B_HUMAN	PP1R	TRIM28	Transcription intermediary factor 1-beta
Q6GV28	TM225_HUMAN	PP1R	TMEM225	Transmembrane protein 225
Q9Y5L0	TNPO3_HUMAN	PP1R	TNPO3	Transportin-3
O94900	TOX_HUMAN	PP1R	TOX	Thymocyte selection-associated high mobility group box protein TOX
Q96NM4	TOX2_HUMAN	PP1R	TOX2	TOX high mobility group box family member 2
O15405	TOX3_HUMAN	PP1R	TOX3	TOX high mobility group box family member 3
O94842	TOX4_HUMAN	PP1R	TOX4	TOX high mobility group box family member 4
Q8TEL6	TP4AP_HUMAN	PP1R	TRPC4AP	Short transient receptor potential channel 4-associated protein
Q4KMQ1	TPRN_HUMAN	PP1R	TPRN	Taperin
P62995	TRA2B_HUMAN	PP1R	TRA2B	Transformer-2 protein homolog beta
Q8IWZ5	TRI42_HUMAN	PP1R	TRIM42	Tripartite motif-containing protein 42
Q9UL62	TRPC5_HUMAN	PP1R	TRPC5	Short transient receptor potential channel 5
P49815	TSC2_HUMAN	PP1R	TSC2	Tuberin
Q9UJT2	TSKS_HUMAN	PP1R	TSKS	Testis-specific serine kinase substrate
Q9BXU3	TX13A_HUMAN	PP1R	TEX13A	Testis-expressed protein 13A
Q9NPG3	UBN1_HUMAN	PP1R	UBN1	Ubinuclein-1
Q6ZT12	UBR3_HUMAN	PP1R	UBR3	E3 ubiquitin-protein ligase UBR3
P11473	VDR_HUMAN	PP1R	VDR	Vitamin D3 receptor
Q9P1Q0	VPS54_HUMAN	PP1R	VPS54	Vacuolar protein sorting-associated protein 54
Q8N398	VW5B2_HUMAN	PP1R	VWA5B2	von Willebrand factor A domain-containing protein 5B2
Q9Y2W2	WBP11_HUMAN	PP1R	WBP11	WW domain-binding protein 11
Q562E7	WDR81_HUMAN	PP1R	WDR81	WD repeat-containing protein 81
Q6UXN9	WDR82_HUMAN	PP1R	WDR82	WD repeat-containing protein 82
Q96MX6	WDR92_HUMAN	PP1R	WDR92	WD repeat-containing protein 92
Q9H4A3	WNK1_HUMAN	PP1R	WNK1	Serine/threonine-protein kinase WNK1
Q96J92	WNK4_HUMAN	PP1R	WNK4	Serine/threonine-protein kinase WNK4
P49750	YLPM1_HUMAN	PP1R	YLPM1	YLP motif-containing protein 1
Q9C0D4	Z518B_HUMAN	PP1R	ZNF518B	Zinc finger protein 518B
Q8NAP3	ZBT38_HUMAN	PP1R	ZBTB38	Zinc finger and BTB domain-containing protein 38
Q8N567	ZCHC9_HUMAN	PP1R	ZCCHC9	Zinc finger CCHC domain-containing protein 9
Q7Z3T8	ZFY16_HUMAN	PP1R	ZFYVE16	Zinc finger FYVE domain-containing protein 16
Q9HBF4	ZFYV1_HUMAN	PP1R	ZFYVE1	Zinc finger FYVE domain-containing protein 1
O95405	ZFYV9_HUMAN	PP1R	ZFYVE9	Zinc finger FYVE domain-containing protein 9
Q9BR11	ZSWM1_HUMAN	PP1R	ZSWIM1	Zinc finger SWIM domain-containing protein 1
Q96MP5	ZSWM3_HUMAN	PP1R	ZSWIM3	Zinc finger SWIM domain-containing protein 3
P41236	IPP2_HUMAN	PP1i	PPP1R2	Protein phosphatase inhibitor 2
Q96A00	PP14A_HUMAN	PP1i	PPP1R14A	Protein phosphatase 1 regulatory subunit 14A
Q96C90	PP14B_HUMAN	PP1i	PPP1R14B	Protein phosphatase 1 regulatory subunit 14B
Q8TAE6	PP14C_HUMAN	PP1i	PPP1R14C	Protein phosphatase 1 regulatory subunit 14C
Q9NXH3	PP14D_HUMAN	PP1i	PPP1R14D	Protein phosphatase 1 regulatory subunit 14D
Q13522	PPR1A_HUMAN	PP1i	PPP1R1A	Protein phosphatase 1 regulatory subunit 1A
Q9UD71	PPR1B_HUMAN	PP1i	PPP1R1B	Protein phosphatase 1 regulatory subunit 1B
P67775	PP2AA_HUMAN	PP2C	PPP2CA	Serine/threonine-protein phosphatase 2A catalytic subunit alpha isoform
P62714	PP2AB_HUMAN	PP2C	PPP2CB	Serine/threonine-protein phosphatase 2A catalytic subunit beta isoform
Q15172	2A5A_HUMAN	PP2R	PPP2R5A	Serine/threonine-protein phosphatase 2A 56 kDa regulatory subunit alpha isoform
Q15173	2A5B_HUMAN	PP2R	PPP2R5B	Serine/threonine-protein phosphatase 2A 56 kDa regulatory subunit beta isoform
Q14738	2A5D_HUMAN	PP2R	PPP2R5D	Serine/threonine-protein phosphatase 2A 56 kDa regulatory subunit delta isoform
Q16537	2A5E_HUMAN	PP2R	PPP2R5E	Serine/threonine-protein phosphatase 2A 56 kDa regulatory subunit epsilon isoform
Q13362	2A5G_HUMAN	PP2R	PPP2R5C	Serine/threonine-protein phosphatase 2A 56 kDa regulatory subunit gamma isoform
P30153	2AAA_HUMAN	PP2R	PPP2R1A	Serine/threonine-protein phosphatase 2A 65 kDa regulatory subunit A alpha isoform
P30154	2AAB_HUMAN	PP2R	PPP2R1B	Serine/threonine-protein phosphatase 2A 65 kDa regulatory subunit A beta isoform
P63151	2ABA_HUMAN	PP2R	PPP2R2A	Serine/threonine-protein phosphatase 2A 55 kDa regulatory subunit B alpha isoform
Q00005	2ABB_HUMAN	PP2R	PPP2R2B	Serine/threonine-protein phosphatase 2A 55 kDa regulatory subunit B beta isoform
Q66LE6	2ABD_HUMAN	PP2R	PPP2R2D	Serine/threonine-protein phosphatase 2A 55 kDa regulatory subunit B delta isoform
Q9Y2T4	2ABG_HUMAN	PP2R	PPP2R2C	Serine/threonine-protein phosphatase 2A 55 kDa regulatory subunit B gamma isoform
Q9P2B4	CT2NL_HUMAN	PP2R	CTTNBP2NL	CTTNBP2 N-terminal-like protein
Q9NVK5	FGOP2_HUMAN	PP2R	FGFR1OP2	FGFR1 oncogene partner 2
P22830	HEMH_HUMAN	PP2R	FECH	Ferrochelatase, mitochondrial
Q06190	P2R3A_HUMAN	PP2R	PPP2R3A	Serine/threonine-protein phosphatase 2A regulatory subunit B'' subunit alpha
Q9Y5P8	P2R3B_HUMAN	PP2R	PPP2R3B	Serine/threonine-protein phosphatase 2A regulatory subunit B'' subunit beta
Q969Q6	P2R3C_HUMAN	PP2R	PPP2R3C	Serine/threonine-protein phosphatase 2A regulatory subunit B'' subunit gamma
Q9Y3A3	PHOCN_HUMAN	PP2R	MOB4	MOB-like protein phocein
Q15257	PTPA_HUMAN	PP2R	PTPA	Serine/threonine-protein phosphatase 2A activator
Q9BRV8	SIKE1_HUMAN	PP2R	SIKE1	Suppressor of IKBKE 1
Q14BN4	SLMAP_HUMAN	PP2R	SLMAP	Sarcolemmal membrane-associated protein
O43815	STRN_HUMAN	PP2R	STRN	Striatin
Q13033	STRN3_HUMAN	PP2R	STRN3	Striatin-3
Q9NRL3	STRN4_HUMAN	PP2R	STRN4	Striatin-4
Q5VSL9	STRP1_HUMAN	PP2R	STRIP1	Striatin-interacting protein 1
Q9ULQ0	STRP2_HUMAN	PP2R	STRIP2	Striatin-interacting protein 2
Q9BTT0	AN32E_HUMAN	PP2i	ANP32E	Acidic leucine-rich nuclear phosphoprotein 32 family member E
Q5HYN5	CT451_HUMAN	PP2i	CT45A1	Cancer/testis antigen family 45 member A1
Q5DJT8	CT452_HUMAN	PP2i	CT45A2	cancer/testis antigen family 45 member A2
Q8NHU0	CT453_HUMAN	PP2i	CT45A3	Cancer/testis antigen family 45 member A3
Q01105	SET_HUMAN	PP2i	SET	Protein SET
P56211	ARP19_HUMAN	PP2i	ARPP19	cAMP-regulated phosphoprotein 19
O43768	ENSA_HUMAN	PP2i	ENSA	Alpha-endosulfine
Q9UIC8	LCMT1_HUMAN	PP246a	LCMT1	Leucine carboxyl methyltransferase 1
P78318	IGBP1_HUMAN	PP246i	IGBP1	Immunoglobulin-binding protein 1
O75663	TIPRL_HUMAN	PP246i	TIPRL	TIP41-like protein
Q9Y570	PPME1_HUMAN	PP246i	PPME1	Protein phosphatase methylesterase 1
Q08209	PP2BA_HUMAN	PP3C	PPP3CA	Serine/threonine-protein phosphatase 2B catalytic subunit alpha isoform
P16298	PP2BB_HUMAN	PP3C	PPP3CB	Serine/threonine-protein phosphatase 2B catalytic subunit beta isoform
P48454	PP2BC_HUMAN	PP3C	PPP3CC	Serine/threonine-protein phosphatase 2B catalytic subunit gamma isoform
P63098	CANB1_HUMAN	PP3R	PPP3R1	Calcineurin subunit B type 1
Q96LZ3	CANB2_HUMAN	PP3R	PPP3R2	Calcineurin subunit B type 2
P60510	PP4C_HUMAN	PP4C	PPP4C	Serine/threonine-protein phosphatase 4 catalytic subunit
Q6IN85	P4R3A_HUMAN	PP4R	PPP4R3A	Serine/threonine-protein phosphatase 4 regulatory subunit 3A
Q5MIZ7	P4R3B_HUMAN	PP4R	PPP4R3B	Serine/threonine-protein phosphatase 4 regulatory subunit 3B
Q8TF05	PP4R1_HUMAN	PP4R	PPP4R1	Serine/threonine-protein phosphatase 4 regulatory subunit 1
Q9NY27	PP4R2_HUMAN	PP4R	PPP4R2	Serine/threonine-protein phosphatase 4 regulatory subunit 2
Q6NUP7	PP4R4_HUMAN	PP4R	PPP4R4	Serine/threonine-protein phosphatase 4 regulatory subunit 4
P53041	PPP5_HUMAN	PP5C	PPP5C	Serine/threonine-protein phosphatase 5
O00743	PPP6_HUMAN	PP6C	PPP6C	Serine/threonine-protein phosphatase 6 catalytic subunit
O15084	ANR28_HUMAN	PP6R	ANKRD28	Serine/threonine-protein phosphatase 6 regulatory ankyrin repeat subunit A
Q8N8A2	ANR44_HUMAN	PP6R	ANKRD44	Serine/threonine-protein phosphatase 6 regulatory ankyrin repeat subunit B
Q8NB46	ANR52_HUMAN	PP6R	ANKRD52	Serine/threonine-protein phosphatase 6 regulatory ankyrin repeat subunit C
Q9UPN7	PP6R1_HUMAN	PP6R	PPP6R1	Serine/threonine-protein phosphatase 6 regulatory subunit 1
O75170	PP6R2_HUMAN	PP6R	PPP6R2	Serine/threonine-protein phosphatase 6 regulatory subunit 2
Q5H9R7	PP6R3_HUMAN	PP6R	PPP6R3	Serine/threonine-protein phosphatase 6 regulatory subunit 3
O14829	PPE1_HUMAN	PP7C	PPEF1	Serine/threonine-protein phosphatase with EF-hands 1
O14830	PPE2_HUMAN	PP7C	PPEF2	Serine/threonine-protein phosphatase with EF-hands 2
